# Supplementary material
Source: PubMed Central journal article supplement (PMC8832304)
Supplement: jama-e221645-s004.pdf [file jama-e221645-s004.pdf]

\*Indicates required information. Only first name, last name, and suffix will appear in PubMed.

| <b>*Group Name(s): CHOICE Investigators</b> |                   |                              |                  |                                |                                          |                                                         |                                                                                            |
|---------------------------------------------|-------------------|------------------------------|------------------|--------------------------------|------------------------------------------|---------------------------------------------------------|--------------------------------------------------------------------------------------------|
| <b>*First Name and Middle Initial(s)</b>    | <b>*Last Name</b> | <b>*Suffix (eg, Jr, III)</b> | Academic Degrees | Institution                    | Location (city, state/province, country) | Role or Contribution, eg, chair, principal investigator | Group (if more than 1 Group listed in the byline) and/or Subgroup (eg, Steering Committee) |
| Laura                                       | Llull             |                              | M.D.             | Hospital Clinic                | Barcelona, Catalonia, Spain              | Sub-Investigator                                        |                                                                                            |
| Martha                                      | Vargas            |                              | PhD.             | Hospital Clinic                | Barcelona, Catalonia, Spain              | Sub-Investigator                                        |                                                                                            |
| Victor                                      | Obach             |                              | M.D.             | Hospital Clinic                | Barcelona, Catalonia, Spain              | Sub-Investigator                                        |                                                                                            |
| Salvatore                                   | Rudilosso         |                              | M.D.             | Hospital Clinic                | Barcelona, Catalonia, Spain              | Sub-Investigator                                        |                                                                                            |
| Alejandro                                   | Rodríguez-Vázquez |                              | M.D.             | Hospital Clinic                | Barcelona, Catalonia, Spain              | Sub-Investigator                                        |                                                                                            |
| Daniel                                      | Santana           |                              | M.D.             | Hospital Clinic                | Barcelona, Catalonia, Spain              | Sub-Investigator                                        |                                                                                            |
| Napoleón                                    | Macías            |                              | M.D.             | Hospital Clinic                | Barcelona, Catalonia, Spain              | Sub-Investigator                                        |                                                                                            |
| Elena                                       | Serrano           |                              | M.D.             | Hospital Clinic                | Barcelona, Catalonia, Spain              | Sub-Investigator                                        |                                                                                            |
| Javier                                      | Moreno            |                              | M.D.             | Hospital Clinic                | Barcelona, Catalonia, Spain              | Sub-Investigator                                        |                                                                                            |
| Natalia                                     | Pérez de la Ossa  |                              | M.D.             | Hospital Germans Trias i Pujol | Badalona, Catalonia, Spain               | Sub-Investigator                                        |                                                                                            |
| Laura                                       | Dorado            |                              | M.D.             | Hospital Germans Trias i Pujol | Badalona, Catalonia, Spain               | Sub-Investigator                                        |                                                                                            |
| Maria                                       | Hernández-Pérez   |                              | M.D.             | Hospital Germans Trias i Pujol | Badalona, Catalonia, Spain               | Sub-Investigator                                        |                                                                                            |
| Meritxell                                   | Gomis             |                              | M.D.             | Hospital Germans Trias i Pujol | Badalona, Catalonia, Spain               | Sub-Investigator                                        |                                                                                            |
| Lucia                                       | Muñoz             |                              | M.D.             | Hospital Germans Trias i Pujol | Badalona, Catalonia, Spain               | Sub-Investigator                                        |                                                                                            |
| P.                                          | Rodríguez-Molinos |                              | M.D.             | Hospital Germans Trias i Pujol | Badalona, Catalonia, Spain               | Sub-Investigator                                        |                                                                                            |

## Supplemental Online Content: Nonauthor Collaborators

\*Indicates required information. Only first name, last name, and suffix will appear in PubMed.

| *First Name and Middle Initial(s) | *Last Name                   | *Suffix (eg, Jr, III) | Academic Degrees | Institution                     | Location (city, state/province, country)  | Role or Contribution, eg, chair, principal investigator | Group (if more than 1 Group listed in the byline and/or Subgroup (eg, Steering Committee)) |
|-----------------------------------|------------------------------|-----------------------|------------------|---------------------------------|-------------------------------------------|---------------------------------------------------------|--------------------------------------------------------------------------------------------|
| Martí                             | Boix                         |                       | M.D.             | Hospital Germans Trias i Pujol  | Badalona, Catalonia, Spain                | Sub-Investigator                                        |                                                                                            |
| Ernest                            | Palomeras                    |                       | M.D.             | Hospital Germans Trias i Pujol  | Badalona, Catalonia, Spain                | Sub-Investigator                                        |                                                                                            |
| F.                                | Núñez                        |                       | M.D.             | Hospital Germans Trias i Pujol  | Badalona, Catalonia, Spain                | Sub-Investigator                                        |                                                                                            |
| Sebastián                         | Remollo                      |                       | M.D.             | Hospital Germans Trias i Pujol  | Badalona, Catalonia, Spain                | Sub-Investigator                                        |                                                                                            |
| Mariano                           | Werner                       |                       | M.D.             | Hospital Germans Trias i Pujol  | Badalona, Catalonia, Spain                | Sub-Investigator                                        |                                                                                            |
| Victor                            | Vera                         |                       | M.D.             | Hospital Josep Trueta Girona    | Girona, Catalonia, Spain                  | Sub-Investigator                                        |                                                                                            |
| Laura                             | Paul                         |                       | M.D.             | Hospital Josep Trueta Girona    | Girona, Catalonia, Spain                  | Sub-Investigator                                        |                                                                                            |
| Laura                             | Pardo                        |                       | M.D.             | Hospital Josep Trueta Girona    | Girona, Catalonia, Spain                  | Sub-Investigator                                        |                                                                                            |
| Montserrat                        | Reina                        |                       | M.D.             | Hospital Josep Trueta Girona    | Girona, Catalonia, Spain                  | Sub-Investigator                                        |                                                                                            |
| Saima                             | Bashir                       |                       | M.D.             | Hospital Josep Trueta Girona    | Girona, Catalonia, Spain                  | Sub-Investigator                                        |                                                                                            |
| Ursula                            | Bojaryn                      |                       | M.D.             | Hospital Josep Trueta Girona    | Girona, Catalonia, Spain                  | Sub-Investigator                                        |                                                                                            |
| Yolanda                           | Silva                        |                       | M.D.             | Hospital Josep Trueta Girona    | Girona, Catalonia, Spain                  | Sub-Investigator                                        |                                                                                            |
| Marina                            | Guasch                       |                       | M.D.             | Hospital Josep Trueta Girona    | Girona, Catalonia, Spain                  | Sub-Investigator                                        |                                                                                            |
| Alan                              | Murillo                      |                       | M.D.             | Hospital Josep Trueta Girona    | Girona, Catalonia, Spain                  | Sub-Investigator                                        |                                                                                            |
| Juan                              | Rodríguez Álvarez-Cienfuegos |                       | M.D.             | Hospital Josep Trueta Girona    | Girona, Catalonia, Spain                  | Sub-Investigator                                        |                                                                                            |
| M.                                | Comas                        |                       | M.D.             | Hospital Josep Trueta Girona    | Girona, Catalonia, Spain                  | Sub-Investigator                                        |                                                                                            |
| B.                                | Martínez                     |                       | M.D.             | Hospital Josep Trueta Girona    | Girona, Catalonia, Spain                  | Sub-Investigator                                        |                                                                                            |
| E.                                | Nogué                        |                       | M.D.             | Hospital Josep Trueta Girona    | Girona, Catalonia, Spain                  | Sub-Investigator                                        |                                                                                            |
| Oscar                             | Chirife                      |                       | M.D.             | Hospital Universitari Bellvitge | Hospitalet de Llobregat, Catalonia, Spain | Sub-Investigator                                        |                                                                                            |
| Helena                            | Quesada                      |                       | M.D.             | Hospital Universitari Bellvitge | Hospitalet de Llobregat, Catalonia, Spain | Sub-Investigator                                        |                                                                                            |
| Blanca                            | Lara                         |                       | M.D.             | Hospital Universitari Bellvitge | Hospitalet de Llobregat, Catalonia, Spain | Sub-Investigator                                        |                                                                                            |

## Supplemental Online Content: Nonauthor Collaborators

\*Indicates required information. Only first name, last name, and suffix will appear in PubMed.

| *First Name and Middle Initial(s) | *Last Name      | *Suffix (eg, Jr, III) | Academic Degrees | Institution                     | Location (city, state/province, country)  | Role or Contribution, eg, chair, principal investigator | Group (if more than 1 Group listed in the byline) and/or Subgroup (eg, Steering Committee) |
|-----------------------------------|-----------------|-----------------------|------------------|---------------------------------|-------------------------------------------|---------------------------------------------------------|--------------------------------------------------------------------------------------------|
| Andres                            | Paipa           |                       | M.D.             | Hospital Universitari Bellvitge | Hospitalet de Llobregat, Catalonia, Spain | Sub-Investigator                                        |                                                                                            |
| Lucia                             | Aja             |                       | M.D.             | Hospital Universitari Bellvitge | Hospitalet de Llobregat, Catalonia, Spain | Sub-Investigator                                        |                                                                                            |
| Paloma                            | Mora            |                       | M.D.             | Hospital Universitari Bellvitge | Hospitalet de Llobregat, Catalonia, Spain | Sub-Investigator                                        |                                                                                            |
| Maria Angel                       | de Miquel       |                       | M.D.             | Hospital Universitari Bellvitge | Hospitalet de Llobregat, Catalonia, Spain | Sub-Investigator                                        |                                                                                            |
| Sónia                             | Aixut           |                       | M.D.             | Hospital Universitari Bellvitge | Hospitalet de Llobregat, Catalonia, Spain | Sub-Investigator                                        |                                                                                            |
| Anna Maria                        | Ferrer          |                       | M.D.             | Hospital Universitari Bellvitge | Hospitalet de Llobregat, Catalonia, Spain | Sub-Investigator                                        |                                                                                            |
| R.                                | Marín           |                       | M.D.             | Hospital Santa Creu i Sant Pau  | Barcelona, Catalonia, Spain               | Sub-Investigator                                        |                                                                                            |
| Luis                              | Prats-Sánchez   |                       | M.D.             | Hospital Santa Creu i Sant Pau  | Barcelona, Catalonia, Spain               | Sub-Investigator                                        |                                                                                            |
| Raquel                            | Delgado-Mederos |                       | M.D.             | Hospital Santa Creu i Sant Pau  | Barcelona, Catalonia, Spain               | Sub-Investigator                                        |                                                                                            |
| A                                 | Martínez-Domeño |                       | M.D.             | Hospital Santa Creu i Sant Pau  | Barcelona, Catalonia, Spain               | Sub-Investigator                                        |                                                                                            |
| Joan                              | Branera         |                       | M.D.             | Hospital Santa Creu i Sant Pau  | Barcelona, Catalonia, Spain               | Sub-Investigator                                        |                                                                                            |
| R.                                | Guerrero        |                       | M.D.             | Hospital Santa Creu i Sant Pau  | Barcelona, Catalonia, Spain               | Sub-Investigator                                        |                                                                                            |
| J,                                | Villalba        |                       | M.D.             | Hospital Santa Creu i Sant Pau  | Barcelona, Catalonia, Spain               | Sub-Investigator                                        |                                                                                            |
| A,                                | Rodríguez       |                       | M.D.             | Hospital Santa Creu i Sant Pau  | Barcelona, Catalonia, Spain               | Sub-Investigator                                        |                                                                                            |
| N.                                | Berga           |                       | M.D.             | Hospital Santa Creu i Sant Pau  | Barcelona, Catalonia, Spain               | Sub-Investigator                                        |                                                                                            |
| Elena                             | Jiménez-Xarrié  |                       | M.D.             | Hospital Santa Creu i Sant Pau  | Barcelona, Catalonia, Spain               | Sub-Investigator                                        |                                                                                            |

## Supplemental Online Content: Nonauthor Collaborators

\*Indicates required information. Only first name, last name, and suffix will appear in PubMed.

| *First Name and Middle Initial(s) | *Last Name | *Suffix (eg, Jr, III) | Academic Degrees | Institution            | Location (city, state/province, country) | Role or Contribution, eg, chair, principal investigator | Group (if more than 1 Group listed in the byline) and/or Subgroup (eg, Steering Committee) |
|-----------------------------------|------------|-----------------------|------------------|------------------------|------------------------------------------|---------------------------------------------------------|--------------------------------------------------------------------------------------------|
| G.                                | Romeral    |                       | M.D.             | Hospital del Mar       | Barcelona, Catalonia, Spain              | Sub-Investigator                                        |                                                                                            |
| Ángel                             | Ois        |                       | M.D.             | Hospital del Mar       | Barcelona, Catalonia, Spain              | Sub-Investigator                                        |                                                                                            |
| Jordi                             | Jiménez    |                       | M.D.             | Hospital del Mar       | Barcelona, Catalonia, Spain              | Sub-Investigator                                        |                                                                                            |
| C.                                | Avellaneda |                       | M.D.             | Hospital del Mar       | Barcelona, Catalonia, Spain              | Sub-Investigator                                        |                                                                                            |
| N,                                | Cayuela    |                       | M.D.             | Hospital del Mar       | Barcelona, Catalonia, Spain              | Sub-Investigator                                        |                                                                                            |
| Ana                               | Rodríguez  |                       | M.D.             | Hospital del Mar       | Barcelona, Catalonia, Spain              | Sub-Investigator                                        |                                                                                            |
| Eva                               | Giralt     |                       | M.D.             | Hospital del Mar       | Barcelona, Catalonia, Spain              | Sub-Investigator                                        |                                                                                            |
| M                                 | Esona      |                       | M.D.             | Hospital del Mar       | Barcelona, Catalonia, Spain              | Sub-Investigator                                        |                                                                                            |
| J.                                | Saldaña    |                       | M.D.             | Hospital del Mar       | Barcelona, Catalonia, Spain              | Sub-Investigator                                        |                                                                                            |
| David                             | Hernández  |                       | M.D.             | Hospital Vall d'Hebrón | Barcelona, Catalonia, Spain              | Sub-Investigator                                        |                                                                                            |
| Marc                              | Ribó       |                       | M.D.             | Hospital Vall d'Hebrón | Barcelona, Catalonia, Spain              | Sub-Investigator                                        |                                                                                            |
| Carlos                            | Piñana     |                       | M.D.             | Hospital Vall d'Hebrón | Barcelona, Catalonia, Spain              | Sub-Investigator                                        |                                                                                            |
| Noelia                            | Rodríguez  |                       | M.D.             | Hospital Vall d'Hebrón | Barcelona, Catalonia, Spain              | Sub-Investigator                                        |                                                                                            |
| Sandra                            | Boned      |                       | M.D.             | Hospital Vall d'Hebrón | Barcelona, Catalonia, Spain              | Sub-Investigator                                        |                                                                                            |
| Carlos                            | Molina     |                       | M.D.             | Hospital Vall d'Hebrón | Barcelona, Catalonia, Spain              | Sub-Investigator                                        |                                                                                            |
| Marta                             | Rubiera    |                       | M.D.             | Hospital Vall d'Hebrón | Barcelona, Catalonia, Spain              | Sub-Investigator                                        |                                                                                            |

## Supplemental Online Content: Nonauthor Collaborators

\*Indicates required information. Only first name, last name, and suffix will appear in PubMed.

| *First Name and Middle Initial(s) | *Last Name     | *Suffix (eg, Jr, III) | Academic Degrees | Institution                   | Location (city, state/province, country) | Role or Contribution, eg, chair, principal investigator                     | Group (if more than 1 Group listed in the byline) and/or Subgroup (eg, Steering Committee) |
|-----------------------------------|----------------|-----------------------|------------------|-------------------------------|------------------------------------------|-----------------------------------------------------------------------------|--------------------------------------------------------------------------------------------|
| Jesús                             | Juega          |                       | M.D.             | Hospital Vall d'Hebrón        | Barcelona, Catalonia, Spain              | Sub-Investigator                                                            |                                                                                            |
| David                             | Rodríguez-Luna |                       | M.D.             | Hospital Vall d'Hebrón        | Barcelona, Catalonia, Spain              | Sub-Investigator                                                            |                                                                                            |
| Juan                              | Pagola         |                       | M.D.             | Hospital Vall d'Hebrón        | Barcelona, Catalonia, Spain              | Sub-Investigator                                                            |                                                                                            |
| Alvaro                            | Garcia-Tonel   |                       | M.D.             | Hospital Vall d'Hebrón        | Barcelona, Catalonia, Spain              | Sub-Investigator                                                            |                                                                                            |
| Matias                            | Deck           |                       | M.D.             | Hospital Vall d'Hebrón        | Barcelona, Catalonia, Spain              | Sub-Investigator                                                            |                                                                                            |
| V                                 | Sala           |                       | M.D.             | Hospital Vall d'Hebrón        | Barcelona, Catalonia, Spain              | Sub-Investigator                                                            |                                                                                            |
| Estela                            | Sanjuan        |                       | M.D.             | Hospital Vall d'Hebrón        | Barcelona, Catalonia, Spain              | Sub-Investigator                                                            |                                                                                            |
| K.                                | Santana        |                       | M.D.             | Hospital Vall d'Hebrón        | Barcelona, Catalonia, Spain              | Sub-Investigator                                                            |                                                                                            |
| C.                                | Losada         |                       | M.D.             | Hospital Vall d'Hebrón        | Barcelona, Catalonia, Spain              | Sub-Investigator                                                            |                                                                                            |
| P.                                | Suñe           |                       | M.D.             | Hospital Vall d'Hebrón        | Barcelona, Catalonia, Spain              | Sub-Investigator                                                            |                                                                                            |
| Tudor G.                          | Jovin          |                       | M.D.             | Cooper University Health Care | Camden, New Jersey, USA.                 | Chair Data Safety Monitoring Board (DSMB)                                   | Data Safety Monitoring Board (DSMB)                                                        |
| Enrique                           | Leira          |                       | M.D.             | Iowa Hospital                 | Iowa City, Iowa, USA                     | Member of Data Safety Monitoring Board (DSMB)                               | Data Safety Monitoring Board (DSMB)                                                        |
| José                              | Rios           |                       | M.D.             | Hospital Clinic               | Barcelona, Catalonia, Spain              | Member (independent biostatistician) of Data Safety Monitoring Board (DSMB) | Data Safety Monitoring Board (DSMB)                                                        |
