# Supplementary material
Source: PubMed Central journal article supplement (PMC8832304)
Supplement: jama-e221645-s005.pdf [file jama-e221645-s005.pdf]

## **Data Sharing Statement**

### **Data**

**Data available:** Yes

**Data types:** Deidentified participant data

**How to access data:** Contact to Dr Ángel Chamorro ([achamorro@clinic.cat](mailto:achamorro@clinic.cat))

**When available:** beginning date: 09-01-2022

### **Supporting Documents**

**Document types:** None

### **Additional Information**

**Who can access the data:** Approved projects.

**Types of analyses:** Any purpose.

**Mechanisms of data availability:** After approval.
